# Supplementary material for: Plant Growth Promoting Rhizobacteria and Silica Nanoparticles Stimulate Sugar Beet Resilience to Irrigation with Saline Water in Salt-Affected Soils
Source: MDPI journal article supplement (doi:10.3390/plants11223117), 2022-11-15
Supplement: s1 [file s1]

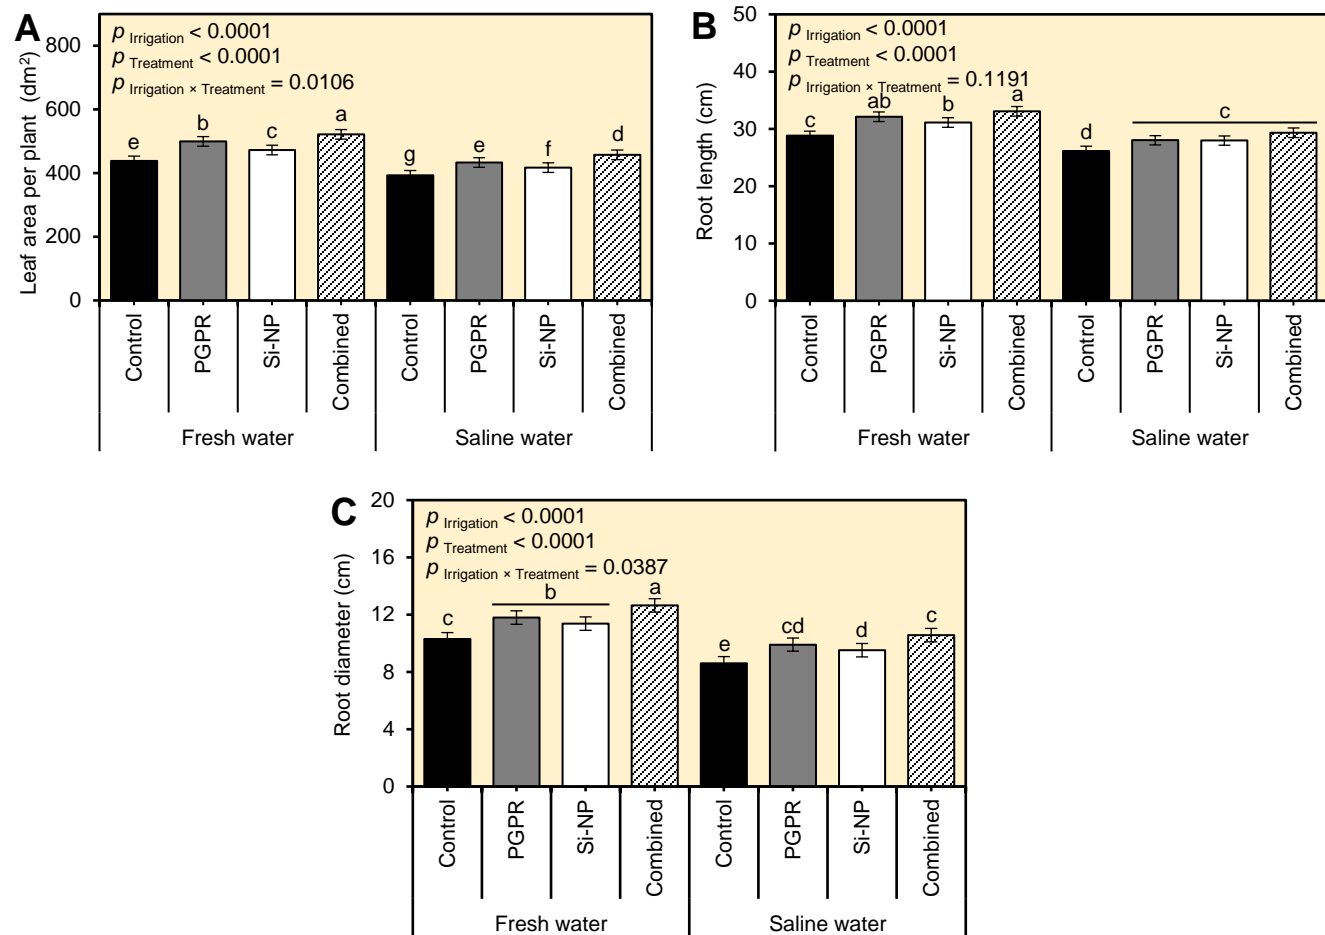

**Figure S1.** Effect of seed inoculation with PGPR and/or Si-NP foliar application on the growth of sugar beet plants grown in salt-affected soil and subjected to saline water irrigation during the 2020/2021 season. **(A)** Leaf area per plant (dm<sup>2</sup>), **(B)** Root length (cm), and **(C)** Root diameter (cm) during the 2020/2021 season, respectively. Data presented are the means  $\pm$  standard deviation (mean $\pm$ SD) of three biological replicates. Different letters signify statistically significant differences between treatments according to Tukey's HSD test ( $p_{\text{Irrigation} \times \text{Treatment}} \leq 0.05$ ).

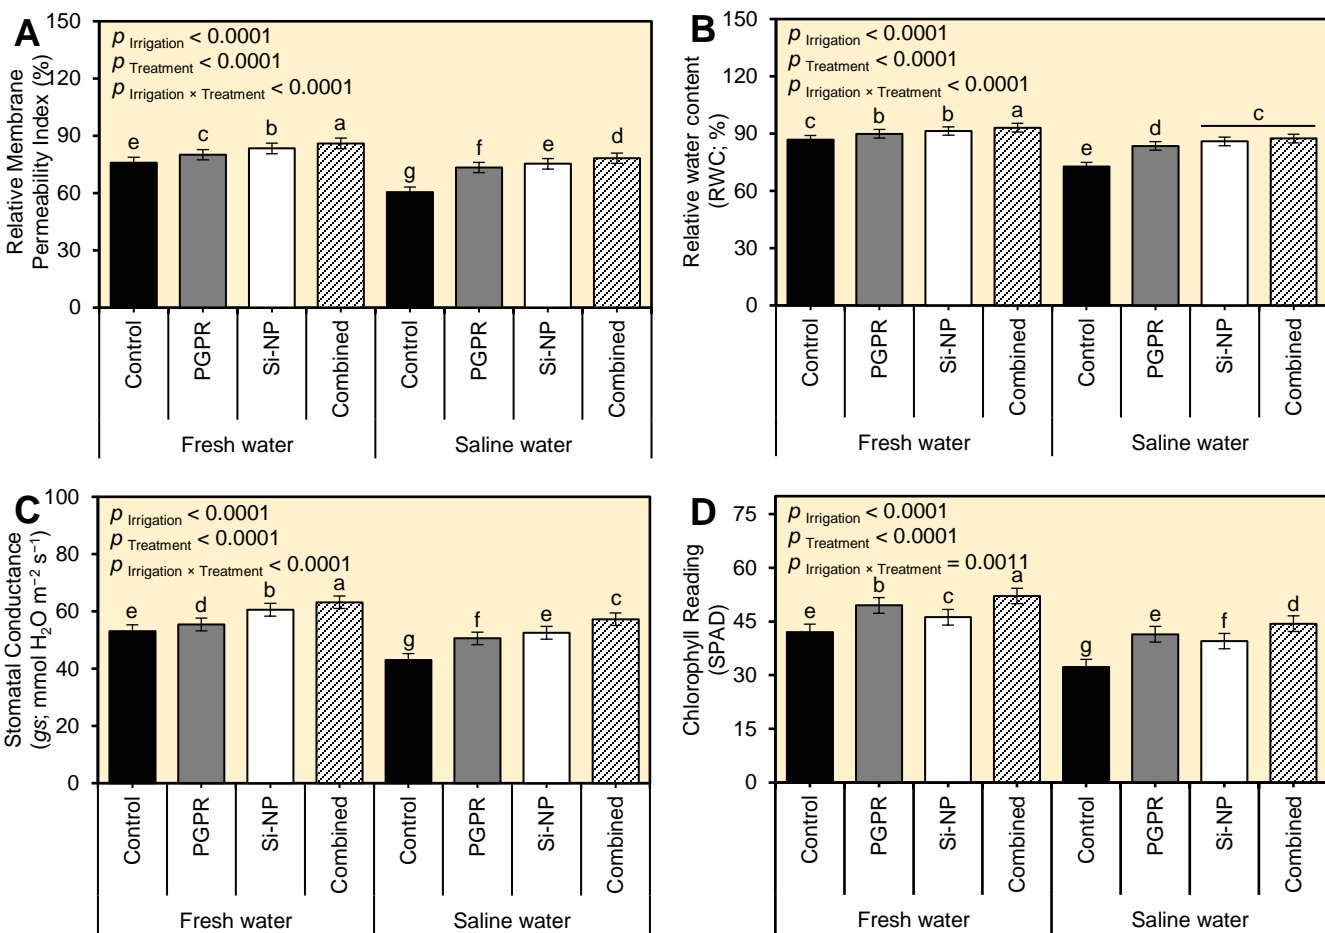

**Figure S2.** Effect of seed inoculation with PGPR and/or Si-NP foliar application on the water relations and chlorophyll reading of sugar beet plants grown in salt-affected soil and subjected to saline water irrigation during the 2020/2021 seasons. (A) Relative membrane permeability index (RMPI), (B) relative water content (RWC), (C) stomatal conductance ( $gs$ ), and (D) chlorophyll reading (SPAD) during 2020/2021 seasons, respectively. Data presented are the means  $\pm$  standard deviation (mean $\pm$ SD) of three biological replicates. Different letters signify statistically significant differences between treatments according to Tukey's HSD test ( $p_{\text{Irrigation} \times \text{Treatment}} \leq 0.05$ ).

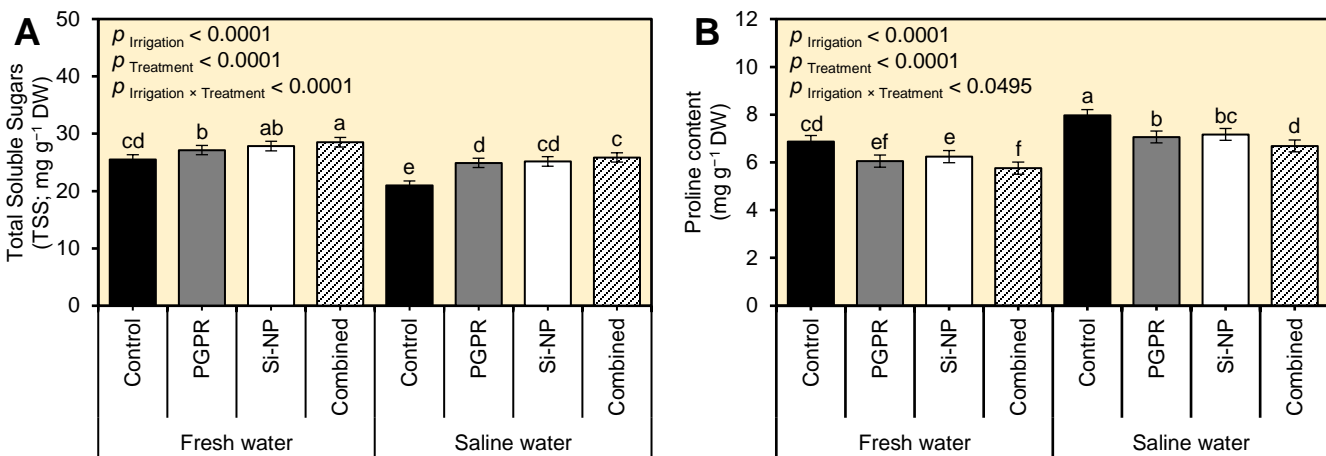

**Figure S3.** Effect of seed inoculation with PGPR and/or Si-NP foliar application on the biochemical response of sugar beet plants grown in salt-affected soil and subjected to saline water irrigation during the 2020/2021 seasons. **(A)** Total soluble sugars (TSS; mg g<sup>-1</sup> DW), and **(B)** Proline content (mg g<sup>-1</sup> DW) during the 2020/2021 seasons, respectively. Data presented are the means  $\pm$  standard deviation (mean $\pm$ SD) of three biological replicates. Different letters signify statistically significant differences between treatments according to Tukey's HSD test ( $p_{\text{Irrigation} \times \text{Treatment}} \leq 0.05$ ).

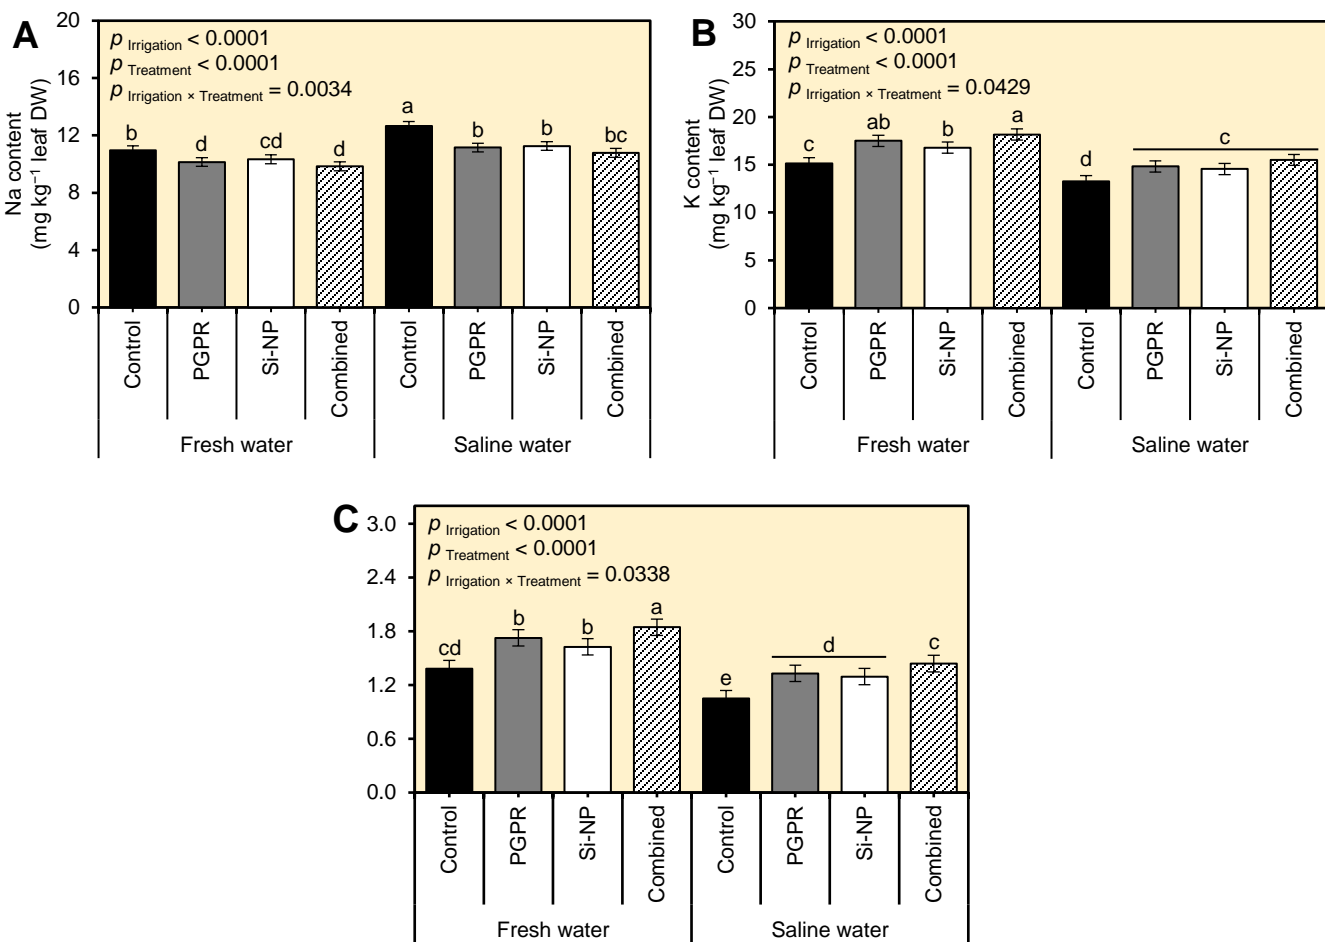

**Figure S4.** Effect of seed inoculation with PGPR and/or Si-NP foliar application on the water relations and chlorophyll reading of sugar beet plants grown in salt-affected soil and subjected to saline water irrigation during the 2020/2021 seasons. **(A)** Na<sup>+</sup> content (mg kg<sup>-1</sup> leaf DW), **(B)** K<sup>+</sup> content (mg kg<sup>-1</sup> leaf DW), and **(C)** K<sup>+</sup>/Na<sup>+</sup> ratio during 2020/2021 seasons, respectively. Data presented are the means  $\pm$  standard deviation (mean $\pm$ SD) of three biological replicates. Different letters signify statistically significant differences between treatments according to Tukey's HSD test ( $p_{\text{Irrigation} \times \text{Treatment}} \leq 0.05$ ).

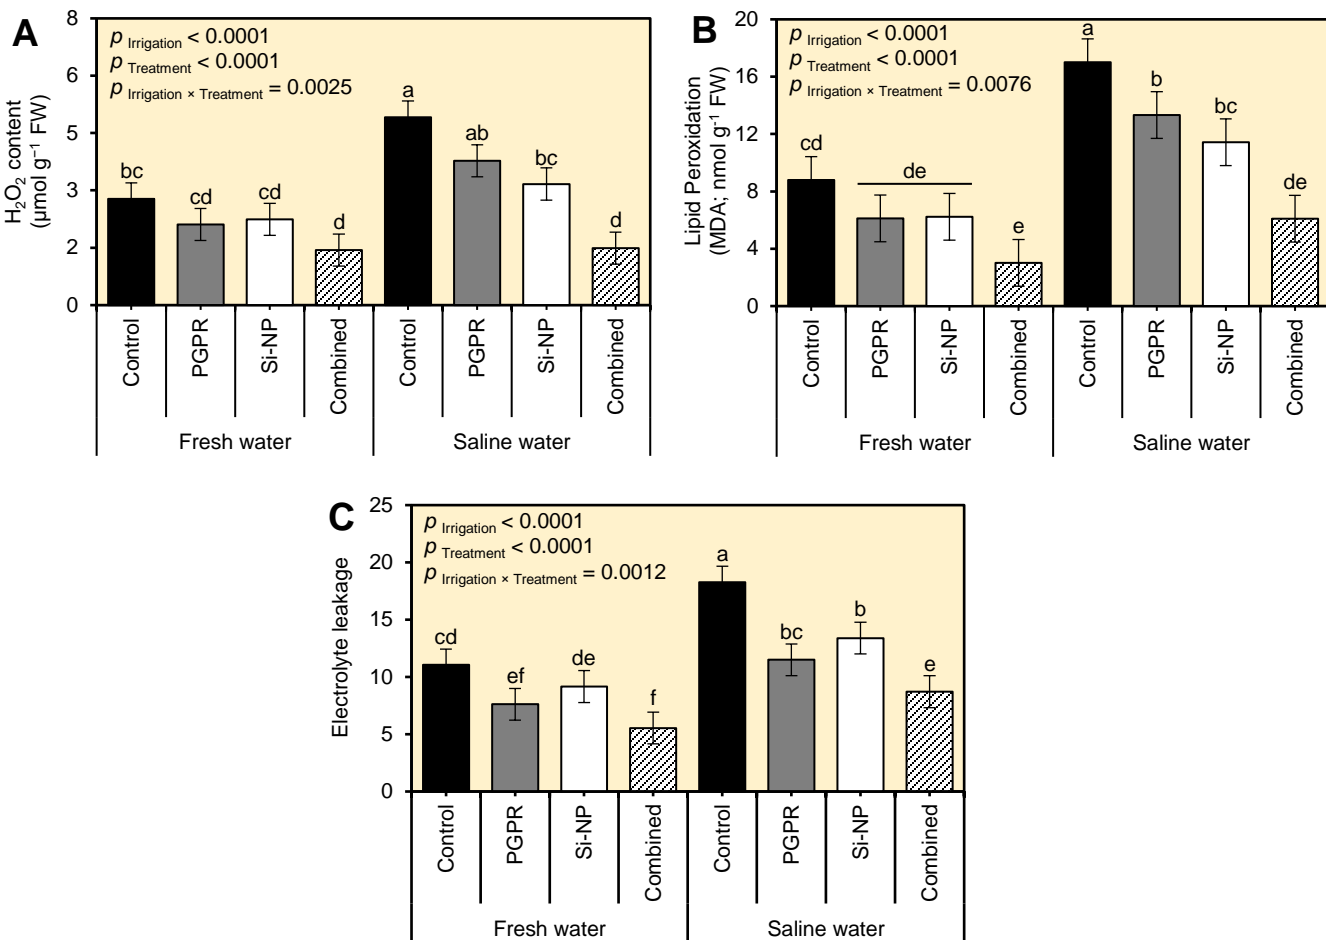

**Figure S5.** Effect of seed inoculation with PGPR and/or Si-NP foliar application on the water relations and chlorophyll reading of sugar beet plants grown in salt-affected soil and subjected to saline water irrigation during the 2020/2021 seasons. **(A)**  $\text{H}_2\text{O}_2$  content ( $\mu\text{mol g}^{-1}$  FW), **(B)** Lipid Peroxidation (MDA;  $\text{nmol g}^{-1}$  FW), and **(C)** Electrolyte leakage (EL; %) during the 2020/2021 seasons, respectively. Data presented are the means  $\pm$  standard deviation (mean $\pm$ SD) of three biological replicates. Different letters signify statistically significant differences between treatments according to Tukey's HSD test ( $p_{\text{Irrigation} \times \text{Treatment}} \leq 0.05$ ).

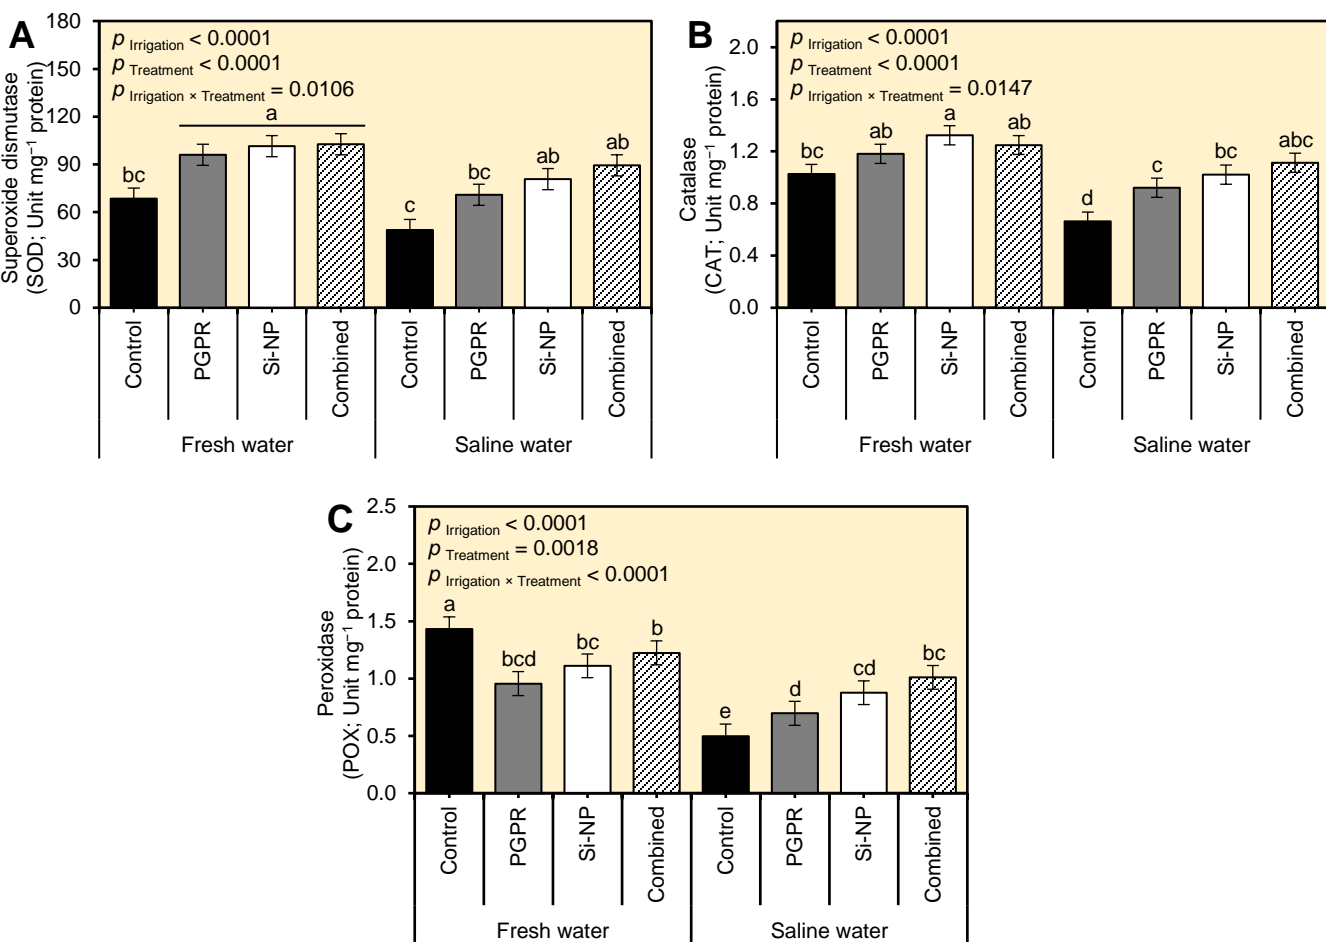

**Figure S6.** Effect of seed inoculation with PGPR and/or Si-NP foliar application on the water relations and chlorophyll reading of sugar beet plants grown in salt-affected soil and subjected to saline water irrigation during the 2020/2021 seasons. (A) Superoxide dismutase (SOD; Unit  $\text{mg}^{-1}$  protein), (B) Catalase (CAT; Unit  $\text{mg}^{-1}$  protein), and (C) Peroxidase (POX; Unit  $\text{mg}^{-1}$  protein) during the 2020/2021 seasons, respectively. Data presented are the means  $\pm$  standard deviation (mean $\pm$ SD) of three biological replicates. Different letters signify statistically significant differences between treatments according to Tukey's HSD test ( $p_{\text{Irrigation} \times \text{Treatment}} \leq 0.05$ ).

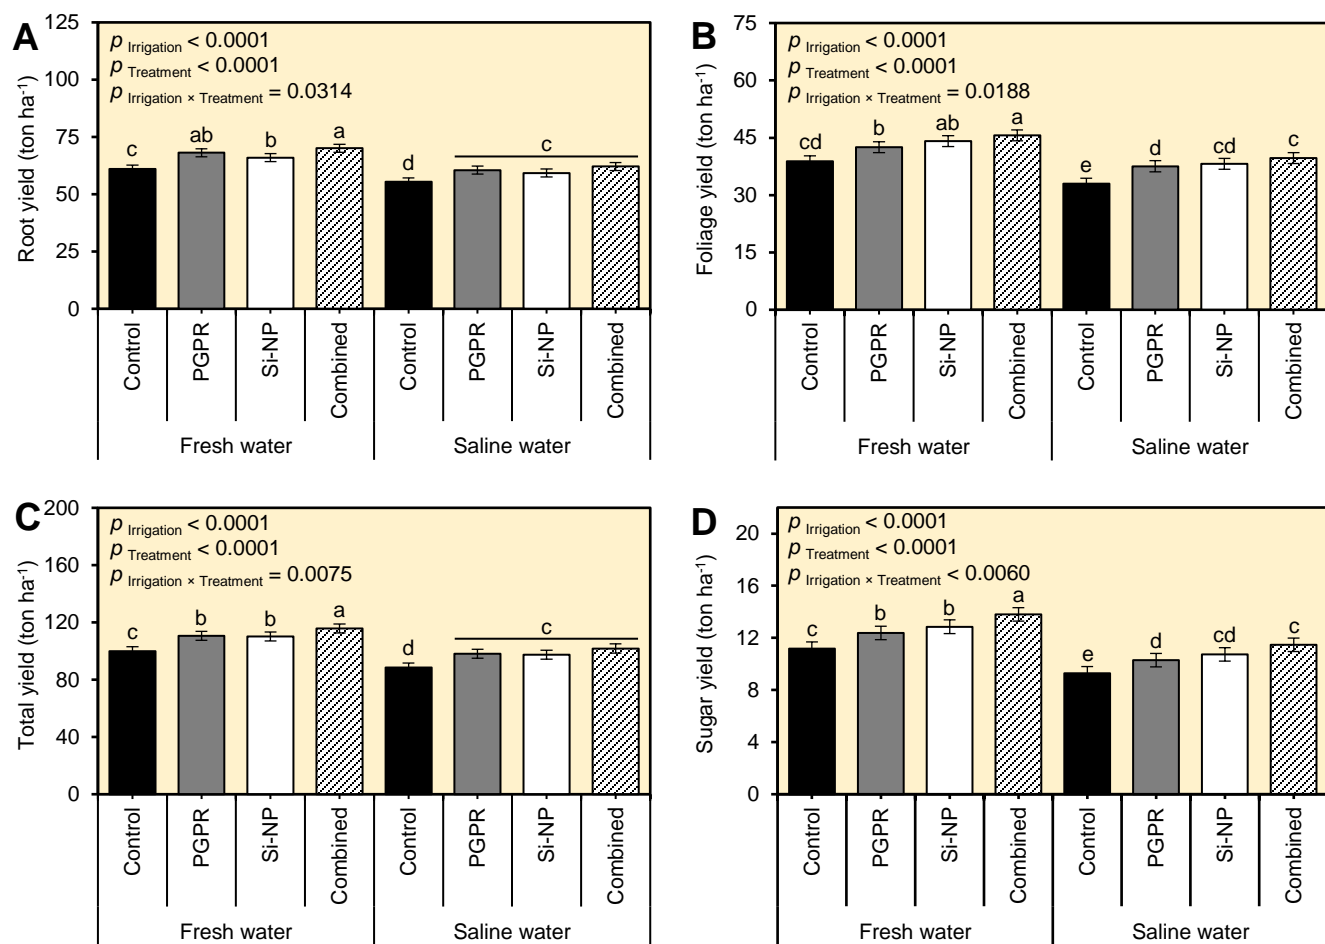

**Figure S7.** Effect of seed inoculation with PGPR and/or Si-NP foliar application on the water relations and chlorophyll reading of sugar beet plants grown in salt-affected soil and subjected to saline water irrigation during the 2020/2021 seasons. (A) Root yield (ton ha<sup>-1</sup>), (B) Foliage yield (ton ha<sup>-1</sup>), (C) Total yield (ton ha<sup>-1</sup>), and (D) Sugar yield (ton ha<sup>-1</sup>) during the 2020/2021 seasons, respectively. Data presented are the means  $\pm$  standard deviation (mean $\pm$ SD) of three biological replicates. Different letters signify statistically significant differences between treatments according to Tukey's HSD test ( $p_{\text{Irrigation} \times \text{Treatment}} \leq 0.05$ ).
